# Supplementary material for: Access to new magnetic cores in Fe(III) and Fe(III)/Cu(II) spin clusters
Source: Royal Society of Chemistry journal article supplement (doi:10.1039/b913102g), 2009-01-01
Supplement: b913102g.pdf [file b913102g.pdf]

## Supporting information for:

### 'Access to new magnetic cores in Fe(III) and Fe(III)/Cu(II) spin clusters'

Alan Ferguson, Julie McGregor, Euan Brechin, Andrew Parkin, Lynne Thomas and Mark Murrie

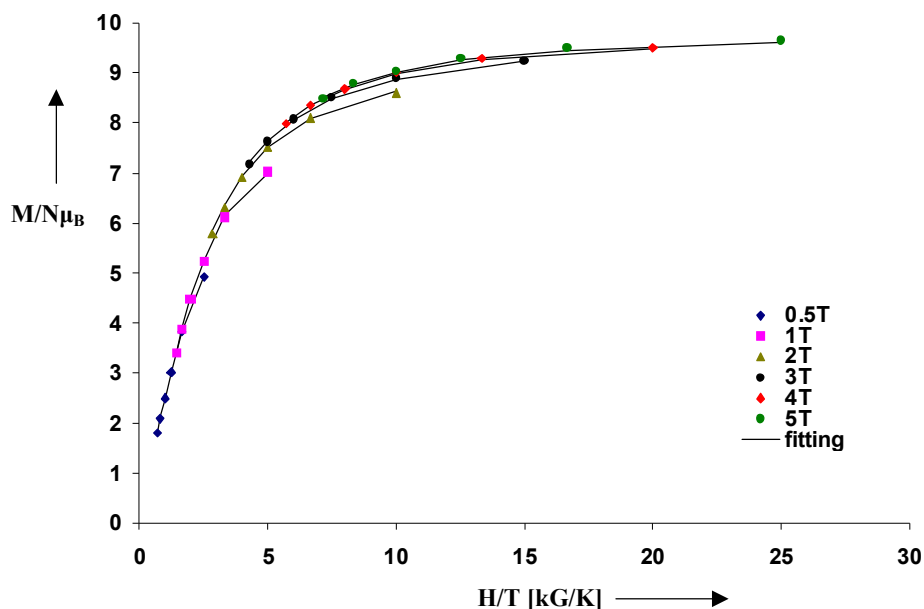

**Figure S1.** Reduced magnetisation ( $M/N\mu_B$ ) vs  $H/T$  for complex 1 in the field and temperature ranges 0.5-5 Tesla and 2-7 K. The solid lines correspond to a fit of the data with  $S=5$ ,  $g=1.96$  and  $D=-0.19$   $\text{cm}^{-1}$ .

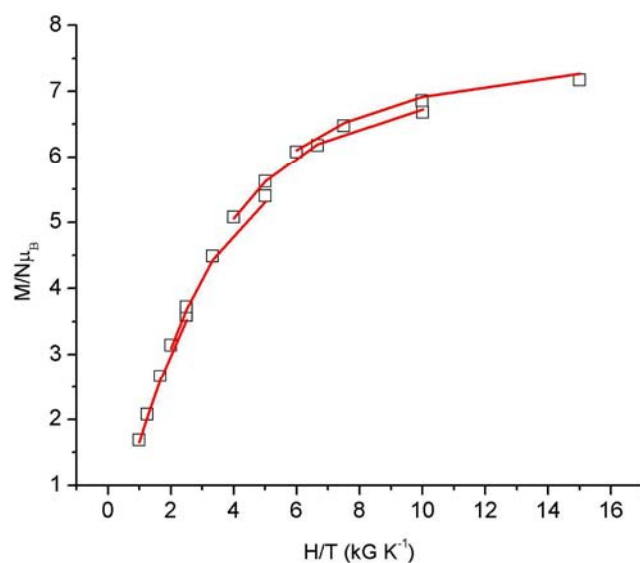

**Figure S2.** Reduced magnetisation ( $M/N\mu_B$ ) vs  $H/T$  for complex 2 in the field and temperature ranges 1-4 Tesla and 2-5 K. The solid lines correspond to a fit of the data with  $S=4$ ,  $g=1.96$  and  $D=-0.24$   $\text{cm}^{-1}$ .
